# Supplementary material for: The Mouse Grimace Scale: A Clinically Useful Tool?
Source: PLoS One. 2015 Sep 25;10(9):e0136000. doi: 10.1371/journal.pone.0136000 (PMC4583436; doi:10.1371/journal.pone.0136000)
Supplement: S1 File — (XLSX) [file pone.0136000.s001.xlsx]

## Sheet: Photo
Strain	Sex	Mouse	Breeder	Cohort	AM	Noon	PM			Strain
1	1	11.01	1	6	3.22	4.33	3.44			1	C57BL6
1	1	11.02	1	6	1.78	4.11	1.11			2	C3H
1	1	11.03	1	6	1.22	3	1.22			3	CD1
1	1	11.04	1	6	3.78	4.89	3.78			4	BALB/C
1	1	11.05	1	6	1.89	2.33	2.67
1	1	11.06	1	6	3.22	3.44	2.22			Sex
1	1	11.07	1	6	3	2.33	2.11			1	Male
1	1	11.08	2	8	1.22	1.67	1.22			2	Female
1	1	11.09	2	8	2.11	1.89	2
1	1	11.1	2	8	2.33	2.78	2.89			Breeder
1	1	11.11	2	8	2.22	2	2.33			1	CBC
1	1	11.12	2	8	3.11	2.33	2.56			2	CR
1	1	11.13	2	8	3	1.78	3.78
1	1	11.14	2	8	1.89	3.56	2.78
1	1	11.15	2	8	1.22	2.89	1.89
1	1	11.16	2	8	1.89	2.11	3
1	1	11.17	2	8	1.89	1	1.44
1	1	11.18	1	9	2.78	2.67	2.44
1	1	11.19	1	9	3.22	2.22	4.22
1	1	11.2	1	9	2.22	3.22	1.89
1	1	11.21	1	9	2	4.44	2.78
1	1	11.22	1	9	1.67	1.78	1.78
1	1	11.23	1	9	0.78	3.33	2.78
1	1	11.24	1	9	2.22	2.22	3.56
1	1	11.25	1	9	1.22	4	3.33
1	1	11.26	1	9	3.56	3	1.78
1	1	11.27	1	9	2	3.22	2.33
1	1	11.28	2	10	3.44	1.67	2.89
1	1	11.29	2	10	3.78	2.67	2.11
1	1	11.3	2	10	3.11	2.78	3.56
1	1	11.31	2	10	2.89	2.44	3
1	1	11.32	2	10	1.44	1.56	3.56
1	1	11.33	2	10	2.11	3.44	2.67
1	1	11.34	2	10	1.78	1.56	4.22
1	1	11.35	2	10	3.11	1.56	3
1	1	11.36	2	10	1.89	2.56	2.44
1	1	11.37	2	10	1.22	2.78	3
1	2	1.01	1	1	2.56	2.11	2
1	2	1.02	1	1	2.67	3.67	4
1	2	1.03	1	1	2	2.33	3.22
1	2	1.04	1	1	0.89	0.89	3
1	2	1.05	1	1	2.33	3.33	3.67
1	2	1.06	1	1	1.33	2.56	3
1	2	1.07	1	1	2.33	3.11	2.33
1	2	1.08	2	2	3.22	3.78	3.22
1	2	1.09	2	2	3	3.44	2.11
1	2	1.1	2	2	3	2.89	1.44
1	2	1.11	2	2	2.44	3.67	3.11
1	2	1.12	2	2	3.44	2.94	2.89
1	2	1.13	2	2	2.33	2.28	3.44
1	2	1.14	2	2	2.67	3.33	3.78
1	2	1.15	2	2	1.67	2	1.78
1	2	1.16	1	3	2	4.11	4
1	2	1.17	1	3	2.89	4.33	3.67
1	2	1.18	1	3	4.22	4.89	4.11
1	2	1.19	1	3	3.78	5.22	5
1	2	1.2	1	3	4.44	3.11	4.33
1	2	1.21	1	3	4	4.33	5.33
1	2	1.22	1	3	3.22	4	3.44
1	2	1.23	1	12	3.78	3.67	3.56
1	2	1.24	1	12	2.78	3.11	1.56
1	2	1.25	1	12	4.22	3.78	3.89
1	2	1.26	1	12	1.89	2.67	2
1	2	1.27	1	12	2.11	2.22	2.89
1	2	1.28	1	12	3	1.22	1.67
1	2	1.29	1	12	4.33	2.89	3.11
1	2	1.3	1	12	1.89	2.89	3.33
1	2	1.31	1	12	2.33	2.11	1.22
1	2	1.32	1	12	2.78	3.44	3.56
2	1	12.01	1	7	2.33	1.78	4
2	1	12.02	1	7	2.44	2.89	2.22
2	1	12.03	1	7	4	2.67	2.22
2	1	12.04	1	7	3.33	2.56	2.22
2	1	12.05	1	7	1.89	5.67	2.67
2	1	12.06	1	11	6.44	4.78	5.44
2	1	12.07	1	11	2.44	3	4
2	1	12.08	1	11	2.11	2.22	2.56
2	1	12.09	1	11	2.56	4	4
2	1	12.1	1	11	4.11	2.78	4
2	2	2.01	2	4	4.33	2.78	4.22
2	2	2.02	2	4	3	2.11	1.89
2	2	2.03	2	4	2.67	3.11	4
2	2	2.04	2	4	3.67	3.22	2.44
2	2	2.05	2	4	2.89	3.33	2.22
2	2	2.06	2	4	2.56	3.67	3.78
2	2	2.07	2	4	2.33	2.44	3.44
2	2	2.08	2	4	4.44	2.44	3.11
2	2	2.09	2	4	3.56	3.22	2.56
2	2	2.1	2	4	4	1.78	4.44
3	1	13.01	2	5	2.89	4.11	5.78
3	1	13.02	2	5	2	1.44	5.33
3	1	13.03	2	5	9999	9999	9999
3	1	13.04	2	5	3.89	4.33	1.11
3	1	13.05	2	5	1.89	2	2.78
3	1	13.06	2	5	3.44	4.56	4.67
3	1	13.07	2	5	3.11	5.78	3.78
3	1	13.08	2	5	2.67	3.56	4
3	1	13.09	2	5	2.56	3.89	5.44
3	1	13.1	2	5	1.67	2.11	1.44
3	2	3.01	2	14	2.56	2.78	4.78
3	2	3.02	2	14	0.78	2.89	2.11
3	2	3.03	2	14	2.11	4.33	2.22
3	2	3.04	2	14	1.56	1.22	3.22
3	2	3.05	2	14	4.33	1.22	2.56
3	2	3.06	2	14	1.56	2.11	2.44
3	2	3.07	2	14	2.44	1.44	0.78
3	2	3.08	2	14	2.67	3	0.22
3	2	3.09	2	14	999	999	999
3	2	3.1	2	14	0.56	0.33	1.78
4	2	1.33	2	13	2.37	2.78	2.78
4	2	1.34	2	13	2.89	2.11	4.78
4	2	1.35	2	13	2.85	2.44	3.44
4	2	1.36	2	13	2.56	2	2
4	2	1.37	2	13	4.11	4.22	4.67
4	2	1.38	2	13	3.41	2	4.78
4	2	1.39	2	13	1.78	1.33	1.78
4	2	1.4	2	13	2.92	4.44	1.33
4	2	1.41	2	13	2.3	4.67	1.22
4	2	1.42	2	13	3.26	2.78	3.22

## Sheet: Live
Strain	Sex	Mouse	Breeder	Cohort	AM	Noon	PM
1	1	11.01	1	6	0.67	1.67	1
1	1	11.02	1	6	0.33	1	0
1	1	11.03	1	6	0	0	0
1	1	11.04	1	6	0.67	0.67	1.67
1	1	11.05	1	6	0	0.67	0.33
1	1	11.06	1	6	0	1	0.33
1	1	11.07	1	6	0	0.67	0.33
1	1	11.08	2	8	0	0.33	0
1	1	11.09	2	8	0	0	0.67
1	1	11.1	2	8	0.33	0	0.33
1	1	11.11	2	8	0.67	0.67	0
1	1	11.12	2	8	1	0.67	0
1	1	11.13	2	8	1	0.67	0.33
1	1	11.14	2	8	0.67	0.67	1
1	1	11.15	2	8	1.33	0.33	0.33
1	1	11.16	2	8	0.67	0.33	0.67
1	1	11.17	2	8	0.33	0	0
1	1	11.18	1	9	0	0.33	0.33
1	1	11.19	1	9	1.33	1	0.33
1	1	11.2	1	9	0.33	0	1
1	1	11.21	1	9	1	0	0.33
1	1	11.22	1	9	0	0	0.33
1	1	11.23	1	9	0.33	0.67	0.67
1	1	11.24	1	9	1	0.33	1.67
1	1	11.25	1	9	0.67	0	0.33
1	1	11.26	1	9	1	0.33	0.33
1	1	11.27	1	9	1	1.33	0.67
1	1	11.28	2	10	1	0.67	0
1	1	11.29	2	10	0.33	0	0
1	1	11.3	2	10	0.33	0.33	0
1	1	11.31	2	10	0.33	1.33	0.33
1	1	11.32	2	10	0	0	0.33
1	1	11.33	2	10	0.33	0	0
1	1	11.34	2	10	0.67	0.33	0.33
1	1	11.35	2	10	0	0.33	0.33
1	1	11.36	2	10	0	0.67	0.33
1	1	11.37	2	10	0	0	0
1	2	1.01	1	1	0.67	0	0.33
1	2	1.02	1	1	0.67	1	0.67
1	2	1.03	1	1	0.33	1.67	0.67
1	2	1.04	1	1	0.33	0.33	0.67
1	2	1.05	1	1	1	1	0.33
1	2	1.06	1	1	0.33	0.33	0.67
1	2	1.07	1	1	0.33	1	1
1	2	1.08	2	2	0.67	0	0.33
1	2	1.09	2	2	0.33	0.33	0.33
1	2	1.1	2	2	0	0	0.33
1	2	1.11	2	2	0.33	0	0.67
1	2	1.12	2	2	0.67	0.33	0.67
1	2	1.13	2	2	0.33	0.33	0.33
1	2	1.14	2	2	0.67	1.33	0.67
1	2	1.15	2	2	1.33	0.67	0.33
1	2	1.16	1	3	0.33	0	0.67
1	2	1.17	1	3	0.33	0.67	1.33
1	2	1.18	1	3	0.33	0.67	0.33
1	2	1.19	1	3	2.67	1	1
1	2	1.2	1	3	0	0.33	0
1	2	1.21	1	3	0	0.67	0
1	2	1.22	1	3	0	0.67	0.67
1	2	1.23	1	12	0	0	0.67
1	2	1.24	1	12	0.33	0.33	0.67
1	2	1.25	1	12	0	1	0
1	2	1.26	1	12	1	0	0
1	2	1.27	1	12	0.33	0	0.33
1	2	1.28	1	12	0	0	0.33
1	2	1.29	1	12	0	0.67	0
1	2	1.3	1	12	0.33	0.33	0.33
1	2	1.31	1	12	0	0.33	0
1	2	1.32	1	12	1	0	0.33
2	1	12.01	1	7	1.33	1.33	2.67
2	1	12.02	1	7	2.33	2.67	4
2	1	12.03	1	7	3	1.67	2
2	1	12.04	1	7	2	1.33	1.33
2	1	12.05	1	7	2.33	3.67	1
2	1	12.06	1	11	4	4	4.33
2	1	12.07	1	11	2	2.33	2
2	1	12.08	1	11	2.67	3.67	3.33
2	1	12.09	1	11	3.67	3.67	3
2	1	12.1	1	11	3	3.67	3.33
2	2	2.01	2	4	2.33	1	3
2	2	2.02	2	4	1.33	1	1
2	2	2.03	2	4	1.33	1.33	1.67
2	2	2.04	2	4	0.33	1.33	0.33
2	2	2.05	2	4	0.67	1	0.67
2	2	2.06	2	4	0.67	2	1
2	2	2.07	2	4	0.33	0.33	1
2	2	2.08	2	4	1.67	1.33	1
2	2	2.09	2	4	1	2	1.67
2	2	2.1	2	4	3	1	2.67
3	1	13.01	2	5	0.33	0	1
3	1	13.02	2	5	0	0	2
3	1	13.03	2	5	1.33	1.33	0.33
3	1	13.04	2	5	1.33	0	0
3	1	13.05	2	5	0.33	2.67	0.33
3	1	13.06	2	5	0.33	3	1.33
3	1	13.07	2	5	1.67	2.33	1
3	1	13.08	2	5	0.67	0.33	0.67
3	1	13.09	2	5	0.33	1.33	0.67
3	1	13.1	2	5	0	0.67	0.67
3	2	3.01	2	14	0.33	0.33	1.67
3	2	3.02	2	14	0	0.67	0
3	2	3.03	2	14	0.67	1	0.33
3	2	3.04	2	14	0.67	0.33	0
3	2	3.05	2	14	0.67	0	0
3	2	3.06	2	14	0.33	0.67	0.33
3	2	3.07	2	14	0	0.33	0.33
3	2	3.08	2	14	0.33	0.33	0
3	2	3.09	2	14	0	0	0.33
3	2	3.1	2	14	0	0	0.33
4	2	1.33	2	13	0	0.67	0.67
4	2	1.34	2	13	0.67	2	3.67
4	2	1.35	2	13	1.33	1.67	1.67
4	2	1.36	2	13	2.67	4.67	1
4	2	1.37	2	13	1	3.67	3.33
4	2	1.38	2	13	0.67	1	2.33
4	2	1.39	2	13	2.33	2.33	1.67
4	2	1.4	2	13	1.67	2.33	0.33
4	2	1.41	2	13	1.33	3.33	0
4	2	1.42	2	13	2.67	3.33	1.33
